# Supplementary material for: Pathological Complete Response with the 4AC-4THP Regimen in Neoadjuvant Treatment of HER2-Positive Breast Cancer: A Multicenter Retrospective Analysis in Vietnam
Source: Research Square preprint supplement (doi:10.21203/rs.3.rs-6400760/v1), 2025-05-22
Supplement: Supplementary file 1 [file c3b0d81b3019d52bd6cc723b.xlsx]

## Sheet: Sheet1
		Clinical Response	Pathological Response
Breast tumor	CR	58	80
	PR	38	16
	SD	4	4
Lymph Nodes	CR	91.2	94.1
	PR	5.9	2.9
	SD	2.9	2.9
Tumor and Lymph Nodes	CR	56	78
	PR	42	20
	SD	2	2
